# 1 **Variable training but not sleep improves consolidation of motor** 2 **adaptation**

3 **Benjamin Thürer<sup>1,\*†</sup>, Frederik D. Weber<sup>2,3,\*†</sup>, Jan Born<sup>2,‡</sup>, Thorsten Stein<sup>1,‡</sup>**

4 <sup>1</sup>BioMotion Center, Institute of Sports and Sports Science, Karlsruhe Institute of Technology, 76131  
5 Karlsruhe, Germany

6 <sup>2</sup>Institute for Medical Psychology and Behavioral Neurobiology, University of Tübingen, 72074  
7 Tübingen, Germany

8 <sup>3</sup>Donders Institute for Brain, Cognition, and Behaviour, Radboud University Medical Centre, 6525 EN  
9 Nijmegen, the Netherlands

10 \*Corresponding authors: benjamin.thuerer@kit.edu, research@frederikweber.com

11 †these authors contributed equally to this work

12 ‡these authors contributed equally to this work

13  
14  
15 How motor memory consolidates still remains elusive. Motor tasks' consolidation were shown to depend  
16 on periods of sleep, whereas pure non-hippocampal dependent tasks, like motor adaptation, might not.  
17 Some research suggests that the mode of training might affect the sleep dependency of motor adaptation  
18 tasks. Here we investigated whether sleep differentially impacts memory consolidation dependent on the  
19 variability during training. Healthy men were trained with their dominant, right hand on a force field  
20 adaptation task and re-tested after an 11-h consolidation period either involving overnight sleep (Sleep) or  
21 daytime wakefulness (Wake). Retesting also included a transfer to the non-dominant hand. Half of the  
22 subjects in each group adapted to different force field magnitudes with low inter-trial variability (Sleep-  
23 Blocked; Wake-Blocked), the other half with high variability (Sleep-Random; Wake-Random). EEG was  
24 recorded during task execution and overnight polysomnography. Motor adaptation was comparable  
25 between Wake and Sleep groups, although performance changes over sleep correlated with sleep spindles  
26 nesting in slow wave upstates. Higher training variability improved retest, including transfer learning, and  
27 these improvements correlated with higher alpha power in contralateral parietal areas. Enhanced  
28 consolidation after training might foster the ability to correct ongoing movements by responsive feedback  
29 rather than their pre-execution prediction.  
30

## 31 Introduction

32 The influence of post-learning sleep on motor memory consolidation has been frequently investigated (1).  
33 However, the literature shows an inconsistent picture with studies supporting (e.g. 2-4) and not supporting  
34 (e.g. 5,6) sleep dependent motor memory consolidation. Many studies, hence, point to a more complex  
35 relationship between specific factors of motor tasks and sleep (7, but also see 8) In a recent qualitative  
36 literature review (1), researchers identified that motor benefits or stabilizations due to sleep can be seen in  
37 explicit sequence learning tasks, specific variants of implicit sequence learning tasks, and specific  
38 visuomotor adaptation tasks, with all of these tasks involving hippocampal function to a certain extent. On  
39 the other side, it has been suggested that specific non-hippocampal-mediated tasks, like motor adaptation  
40 to dynamic perturbations (e.g. force field adaptation, 9), reflect a motor memory process that is purely  
41 time- but not sleep-dependent (5), although those results, to the best of our knowledge, have not been  
42 confirmed so far.

43 Beyond sleep's dependency on specific task aspects, the effects might also depend on the specific  
44 training schedule. Several studies showed that motor training under highly unstable conditions, compared  
45 to more stable conditions, enhances posttest and transfer performance, suggesting that depending on the  
46 training schedule different memory systems are involved (e.g. 10-12). Furthermore, it has been assumed  
47 that specifically benefits after variable training depend on sleep (1). This assumption is derived from a  
48 study investigating imaginary training which showed that variable but not constant mental training of a  
49 motor task leads to sleep dependent memory improvements (13). Moreover, other studies revealed that  
50 hippocampal dependency of a motor task changes with the schedule and the amount of training (14-16).

51 In this study, we assessed the effects of sleep on memory for a force field adaptation task.  
52 Specifically, we were interested whether effects of sleep might express depending on the variability of  
53 different force fields used during training. For this purpose, subjects were examined either in more stable  
54 or highly unstable training conditions, and retested after periods of sleep or wakefulness with the same  
55 arm. Since previous work from our lab showed sleep dependent consolidation effects for contralateral  
56 transfer (17), we also examined transfer performance on the contralateral hand. We recorded EEG  
57 correlates during training, intervening sleep, and during retest, and also aimed to characterize the role of  
58 online feedback mechanisms in mediating improvements during movement execution.

## 59 Results

### 60 Behavioral results

61 All groups adapted to the dynamic force fields and decreased their motor error (quantified by the enclosed  
62 area, EA) during Training (Fig. 2a,b,  $F(1,44) = 143.05$ ,  $p < 0.001$ ,  $pEta^2 = 0.765$ , for ANOVA with factor  
63 time (First Training Trials, Last Training Trials)) independent of Sleep/Wake conditions ( $F(1,44) = 0.06$ ,  
64  $p = 0.801$ ,  $pEta^2 = 0.001$ ) or Blocked/Random training conditions ( $F(1,44) = 1.95$ ,  $p = 0.169$ ,  $pEta^2 =$   
65  $0.042$ ). The Blocked groups adapted faster during Training than the Random groups (time\*training,  
66  $F(1,44) = 4.50$ ,  $p = 0.040$ ,  $pEta^2 = 0.093$ ; time\*sleep,  $F(1,44) = 1.29$ ,  $p = 0.262$ ,  $pEta^2 = 0.028$ , for mixed  
67 ANOVA with factors training (Blocked, Random), sleep (Sleep, Wake), and time (First Training Trials,  
68 Last Training Trials)). Faster learning for Blocked groups was confirmed by FDR corrected *post-hoc t-*  
69 *tests* on Last Training Trials between Random and Blocked groups ( $t(46) = 3.96$ ,  $p = 0.002$ ,  $d = 1.144$ ).

70 Random and Blocked groups started with similar Posttest performance (Fig. 2a,b), showing that  
71 the retention from the Last Training Trials (11 hours earlier) to Posttest was worse for the Blocked  
72 compared to the Random groups (Fig 2b, retention\*training,  $F(1,44) = 6.95$ ,  $p = 0.012$ ,  $pEta^2 = 0.136$ , for  
73 mixed ANOVA with factors retention (Last Training Trials, Posttest) and training (Blocked, Random)),  
74 but independent of sleep (retention\*sleep,  $F(1,44) = 1.68$ ,  $p = 0.201$ ,  $pEta^2 = 0.037$ ) for any group  
75 combination (retention\*sleep\*training,  $F(1,44) = 1.44$ ,  $p = 0.237$ ,  $pEta^2 = 0.032$ , for mixed ANOVA with  
76 factors retention (Last Training Trials, Posttest), training (Blocked, Random) and sleep (Sleep, Wake)).  
77 The benefit of Random over Blocked training manifested quickly during the Posttest from the 5<sup>th</sup> trial  
78 onwards (Fig. 2c). This benefit is also confirmed by Pearson correlation analyses showing that training  
79 success (i.e., lower motor error at the end of Training) was inversely related to retention success  
80 (percentage of Posttest error related to last Training error,  $r = -0.78$ ,  $p < 0.001$ ,  $n = 48$ ) with this effect  
81

82 weaker in the Random ( $r = -0.51, p = 0.01, n = 24$ ) than in the Blocked groups ( $r = -0.86, p < 0.001, n =$   
83  $24; p = 0.018, z = 2.36$ , for the difference using Fisher r-to-z transformation). However, training success in  
84 general was moderately predictive and positively correlated with the overall Posttest performance for all  
85 groups ( $r = 0.29, p = 0.044, n = 48$ ; for any group  $r$  is within 0.167–0.35). This suggests, though initial  
86 Training performance might benefit from a blocked training schedule, motor memory retention benefit  
87 from a randomized training schedule. These processes were unaffected by sleep.

88 We further investigated if memory consolidation also enhanced the generalization from the  
89 dominant hand (during Training) to the non-dominant (Transfer). All groups performed worse during  
90 Transfer testing as compared to the Last Training Trials ( $F(1,44) = 483.56, p < 0.001, pEta^2 = 0.917$ ). In  
91 addition, initial Transfer performance of all groups was worse compared to the initial Training  
92 performance (First Training Trials; Fig. 2). This lower initial performance during contralateral transfer  
93 learning indicates that participants expected the force field in the opposite direction as during Training  
94 (relying on an internal rather than an external representation). This is also supported by the motor  
95 prediction (force field compensation factor, FFCF) showing similar force field predictions in the initial  
96 Transfer trials for the Blocked and Random groups (Blocked: -15.64 %, SD 16.61 %; Random: -15.62 %,  
97 SD 17.85 %, negative sign indicates expectation of opposite force field direction). Motor error in Transfer  
98 test was lower in the Random than in the Blocked groups (retention\*training,  $F(1,44) = 16.57, p < 0.001,$   
99  $pEta^2 = 0.274$ , for mixed ANOVA with factors retention (Last Training Trials, Transfer) and training  
100 (Blocked, Random)) and this effect manifested immediately after the first Transfer trial (Fig. 2a,d).  
101 Transfer learning effects were independent of sleep (retention\*sleep,  $F(1,44) = 0.11, p = 0.742, pEta^2 =$   
102  $0.002$ ) and not strongly predictive by training success (for all groups  $r = 0.12, p = 0.42, n = 48$ ; Random  
103 group  $r = 0.14, p = 0.54, n = 24$ ; Blocked group  $r = 0.395, p = 0.056, n = 24$ ). However, transfer learning  
104 was strongly influenced by motor memory retention, that is, improvements over the retention period from  
105 Last Training Trials to Posttest were associated with improvements from Last Training Trials to Transfer  
106 ( $r = 0.84, p < 0.001, n = 48$ ), an association that was weaker for the Random ( $r = 0.48, p = 0.024, n = 24$ )  
107 than for the Blocked groups ( $r = 0.88, p < 0.001, n = 24; p = 0.007, z = 2.72$ , for the difference between  
108 correlation coefficients after Fisher r-to-z transformation). This suggests that, in general, an enhanced  
109 consolidation from Training to Posttest is strongly connected to an enhanced Training to Transfer  
110 consolidation but transfer learning was less hampered by motor memory consolidation after random than  
111 after blocked training.

112 Motor error quantified by EA is affected by both, predictive feedforward and responsive motor  
113 feedback. As the feedback responses typically start to compensate for feedforward errors already at 100  
114 ms (18) and the average trial duration across groups was about 550 ms, EA should mostly reflect the  
115 feedback responses. Thus, we tested if the observed influences of training conditions also underlie  
116 feedforward motor prediction as measured by FFCF. Neither training nor sleep condition influenced motor  
117 prediction changes from Training to Posttest (retention\*sleep,  $F(1,44) = 1.23, p = 0.274, pEta^2 = 0.027$ ;  
118 retention\*training,  $F(1,44) = 0.56, p = 0.459, pEta^2 = 0.013$ ) or Training to Transfer (retention\*sleep,  
119  $F(1,44) = 1.37, p = 0.249, pEta^2 = 0.030$ ; retention\*training,  $F(1,44) = 0.41, p = 0.524, pEta^2 = 0.009$ ).  
120 This suggests that the observed effect here is more affected by late feedback than early feedforward  
121 responses.

122  
123 **Task-EEG**  
124 Explorative analysis using cluster-based statistics for a possible retention\*sleep effect (with retention: Last  
125 Training Trials, Posttest; Last Training Trials, Transfer) revealed that cortical activity in all frequency  
126 bands were unaffected by Sleep vs. Wake. Thus, we focused on further task-EEG analysis regarding the  
127 training conditions (Blocked, Random).

128 Analysis of a possible training condition effect was restricted to the alpha band power (Fig. 3)  
129 over parietal areas according to previous work showing a linkage between training effect and force field  
130 adaptation only in alpha frequencies (19). Based on these previous findings, we defined a left- and right-  
131 hemispheric region of interest (ROI: CP5, CP1, Pz, P3; ROIr: CP6, CP2, Pz, P4) and found a higher alpha  
132 band power for the Random compared to the Blocked groups in the Posttest and a similar effect which did  
133 not reach significance in the Transfer test, both during movement execution (Posttest,  $t(46) = -2.22, p =$

134 0.031,  $d = 0.642$ , for  $t$ -test of ROI; Transfer,  $t(44) = -1.85$ ,  $p = 0.072$ ,  $d = 0.543$ , for  $t$ -test of ROIr).  
135 Increased alpha band values over ROI from Training to Posttest during movement execution were  
136 associated with better task retention success (quantified by a small Training-to-Posttest difference of the  
137 motor error; Fig. 4) for participants of the Random but not of the Blocked groups (Random,  $\rho = -0.50$ ,  $p =$   
138  $0.031$ ; Blocked,  $\rho = 0.04$ ,  $p = 1.0$ , for Spearman correlations with  $\rho$  representing Spearman's rho). This  
139 suggests that random training of force fields affects the parietal alpha band activity of the Posttest.

140 Furthermore, we explored if the behavioral retention effects (Training-to-Posttest, Training-to-  
141 Transfer), are predictable by EEG's alpha band power during Training. Spearman correlations indicate  
142 positive but weak associations from Training-to-Posttest for both groups (Random, Blocked), phases  
143 (planning, execution), and ROIs (ROI, ROIr), which did not reach statistical significance (Fig. 5).  
144 However, associations of Training-to-Transfer consolidation were strong for Blocked ( $\rho$  in all cases  
145 between 0.39 and 0.60) but still weak for Random groups ( $\rho$  between 0.04 and 0.20). These positive  
146 correlations for Blocked groups were still statistically significant after FDR correction for ROI (Fig. 5;  
147 planning,  $\rho = 0.595$ ,  $p = 0.025$ ; execution,  $\rho = 0.550$ ,  $p = 0.025$ ) but only during trial execution for ROIr  
148 (planning,  $\rho = 0.389$ ,  $p = 1.0$ ; execution,  $\rho = 0.486$ ,  $p = 0.050$ ).

149

### 150 Sleep-EEG

151 Though sleep during consolidation did not improve the motor performance more than wake-time, we  
152 explored which activity during sleep could give an indication of the consolidation processes to happen  
153 during the time of sleep. None of the basic sleep stage parameters correlated with consolidation  
154 performance (Supplementary Table S1).

155 Consolidation success was predicted by sleep spindles and their occurrence during upstates of  
156 slow waves (Supplementary Table S2). In brief, longer sleep spindles and especially their occurrence  
157 (count and density) during upstates of slow waves were associated with improvements from Training to  
158 Posttest and Training to Transfer. This effect was most pronounced in the left parietal area (i.e., P3,  
159 corresponding to ROI) and also indicated by more slow-wave activity (power density) during sleep-  
160 spindle enriched Stage 2 sleep. A less steep decline in oscillation frequency (i.e. less 'chirp' towards lower  
161 oscillation frequency) during such spindles predicted worsening from Training to Transfer, and a higher  
162 sleep spindle oscillation frequency in fronto-central areas was predictive for the deterioration of the motor  
163 performance from Training to Posttest or Training to Transfer. Higher dispersion of sleep spindles locked  
164 to the slow wave down state (in Cz), which suggests generally impaired mechanisms in the timing of sleep  
165 spindles and slow waves, predicted less improvements during Transfer compared to Training. No other  
166 sleep measures reached significant correlation with consolidation measures.

167

### 168 Discussion

169 Our results show that Random and Blocked groups adapted to the force field conditions successfully.  
170 Subsequent consolidation was influenced by training conditions but unaffected by intervening sleep.  
171 Regarding training conditions, although Training outcome was worse for the Random than Blocked  
172 groups, all groups showed a similar motor performance in the Posttest and Random groups showed an  
173 even more pronounced motor performance compared to the Blocked groups when tested for transfer on  
174 the untrained, non-dominant hand. This improvement expressed itself in reductions in motor error  
175 (enclosed area), which is mostly affected by responsive feedback corrections, but not in the measure of  
176 motor prediction (force field compensation factor).

177 Our behavioral results exclude a substantial profit from sleep on the present motor adaptation task.  
178 Task performance and measures of consolidation were independent on whether participants spent awake  
179 or asleep during the intervening time between Training and Retest. Thus, our study confirms earlier  
180 findings (5) and concurs with some force field studies (20,21) claiming that consolidation of motor  
181 adaptation towards dynamic perturbations is time but not sleep dependent. Previous work suggested that  
182 force field adaptation represents a non-hippocampal dependent, implicit memory (20,22). Accordingly,  
183 our negative findings here agree with the assumption that only hippocampal dependent motor processes  
184 benefit from sleep (1). However, research showed that hippocampal damage deteriorates the benefits of

185 unstable training conditions (16), indicating that a motor task might become hippocampal-dependent - and  
186 thus would be expected to become sleep-dependent - when trained under highly unstable conditions  
187 (1,13). However, this view is not supported by our behavioral data also showing now sleep effects for the  
188 Random groups. The exact extent to which motor adaptation after variable training becomes hippocampal-  
189 dependent is unclear and need to be elaborated in future studies.

190 Despite the lack of a consolidation benefit of sleep over wake retentions, the consolidation success  
191 correlated positively with sleep spindle activity during slow-wave upstates. This is at odds with the view  
192 that consolidation of motor adaptation learning is completely independent of hippocampal processes,  
193 because the coalescence of spindle and slow-wave activity during sleep is thought to benefit consolidation  
194 of hippocampal-dependent tasks in particular (22-24). Intriguingly, we found task-consolidation-  
195 associated alpha activity over parietal brain regions which matches the strong association of sleep-  
196 mediated consolidation in the same regions. This concurs with the view that cortical regions that were  
197 engaged in learning have a strong local association with spindles and slow waves in subsequent sleep (25)  
198 and predict the extent of consolidation (26). If such associations are functionally involved in the  
199 consolidation process in our data or are merely a reflection of consolidation success of other memories,  
200 not tested by our task, is unclear.

201 We found variable training in the motor adaptation task was predictive of consolidation benefits.  
202 This study therefore reproduced earlier findings of the contextual interference effect (12,27) in that higher  
203 training variability led to a decreased motor performance at the end of Training, but to a performance  
204 similar to that of the blocked training groups on the Posttest and to even performance benefits on the  
205 Transfer test. As previously reported (19), this gain induced by variable training is only seen in the motor  
206 error which is mostly affected by feedback responses. By contrast, motor prediction again did not show  
207 this effect. Because subjects do not receive task specific feedback during force channel trials, FFCF is  
208 only feedforward dependent (28,29). Therefore, it is likely that the motor benefits of the Random groups  
209 were facilitated by feedback corrections during movement execution evoked by the permanent regulation  
210 of random, unexpected forces during Training.

211 Although the Random groups ended their training worse compared to the Blocked groups, their  
212 Posttest performance was comparable. This points to unstable training conditions to either prime for better  
213 memory consolidation or the formation of memory that is more stable. Also, the generalization to the  
214 Transfer test on the left hand was more pronounced in the Random groups. The consistency of this  
215 generalization benefit over 30 trials speaks for a stable long-term memory effect. This was confirmed by  
216 the significant association of the Training performance and benefits in memory consolidation that is lower  
217 Training performance (in terms of higher motor error) from unstable training also led to better retention  
218 performance.

219 During Transfer testing, the participants expected a force field on their left hand that was directed  
220 in the opposite direction than force field was during Training of the right hand which explains the initially  
221 worse Transfer performance present in all groups when compared to initial Training and Posttest  
222 performance. This suggest the generalization not to take place in an extrinsic force field transformation  
223 but rather in intrinsic, mirror symmetric coordinates, that is, perturbation was expected to come from right  
224 on the right hand and from left on the left hand. This agrees with the literature (9) but contradicts the  
225 preference of extrinsic coordinates in other studies (30,31). The divergent findings of coordinate systems  
226 in use for generalization are in line with the recent assumption that representations might occur in a  
227 mixture of coordinate systems (32,33).

228 Paradoxically, we do not find an even more decreased initial Transfer performance for Random  
229 groups, as would be expected by a more stable intrinsic representation in this group which gives rise to  
230 predict the force field in the opposite 'wrong' direction during Transfer. But the opposite was the case,  
231 i.e., the Random groups showed an enhanced Transfer performance compared to the Blocked groups.  
232 There are three possible explanations for this outcome:

233 (1) Generalization was worse for the Random compared to the Blocked groups. Increased motor  
234 performance of the Random group might be facilitated by a weaker generalization or consolidation of the  
235 generalized memory. However, motor performance quantified by the motor prediction showed similar  
236 Transfer performances for all groups, indicating similar generalizations between groups.

237 (2) Random training favored the formation of a different coordinate system (or mixture of  
238 systems, 32). The results, however, do not support such explanation as motor predictions were similar  
239 between groups. In addition, inspection of single individual data revealed cues for an extrinsic force field  
240 representation in only 4 of the 24 participants of the Random groups. This was also the case in 2 of the 24  
241 participants of the Blocked groups.

242 (3) Random training led to a generally increased ability to use feedback responses. This  
243 explanation is supported by the finding that only motor error, which is sensitive to feedback corrections,  
244 but not motor prediction showed an increased memory consolidation for the Random groups. In addition,  
245 the EEG data shows that parietal but not frontal areas of the brain are involved in the contextual  
246 interference effect, with the former known to be specifically implicated in sensory integration (34).  
247 However, future research should further investigate the influence of variable training on online feedback  
248 corrections in motor behavior.

249 Altogether, variable training leads to benefits in consolidation of a force field adaptation task.  
250 This effect is even more prominent when retention is tested on the contralateral hand. We assume that the  
251 increased consolidation after highly variable training is facilitated by an increased ability to use online  
252 feedback corrections.

253 Task-EEG during task performance showed that behavioral changes across the consolidation  
254 period after Random training are accompanied with a parallel increase (from Training to Posttest) in alpha  
255 band power over parietal areas, which concurs with previous findings from our lab (19). In detail, we were  
256 able to reproduce a negative correlation between changes in alpha power over contralateral parietal areas  
257 (ROI) and motor error during movement execution. An increased alpha band power is frequently  
258 discussed as a sign of an active inhibition of the underlying cortical region (35). Therefore, a negative  
259 correlation might indicate that, for Random groups, a more accurate and, thus, better consolidated motor  
260 performance comes in parallel with an increased inhibition of parietal areas.

261 The results also showed that consolidation in this force field adaptation task can be predicted by  
262 the alpha power over parietal areas during Training. Blocked but not Random groups showed significant  
263 associations between Training-to-Transfer consolidation and the alpha band power. Thus, high parietal  
264 alpha power and, thus, inhibition of parietal cortical areas during Training, might favor a weaker  
265 consolidation for the Blocked but not for the Random groups. Intriguing questions arising here are  
266 whether the greater efficacy of random training specifically results from its ability to counter the  
267 disadvantage of increased parietal alpha power during training and whether parietal alpha power is  
268 connected to online feedback corrections of the motor system.

269

## 270 **Methods**

### 271 **Participants**

272 Forty-eight healthy, male participants recruited from the local university campus were included in the  
273 study (age  $24.27 \pm 0.45$  yrs.). All participants were native German speakers with normal or corrected to  
274 normal vision and were tested for right-handedness by the Edinburgh handedness inventory (36). They  
275 reported not to nap habitually or have any sleep disorders and did not take any medication at the time of  
276 the experiments. Participants followed a normal sleep-wake rhythm and reported no night shifts during  
277 the 6 weeks before the experiment. Participants were instructed to keep a regular sleep schedule, abstain  
278 from caffeine- and alcohol-containing drinks for at least 2 days before and on the days of the experiments.  
279 Experimental task and task-protocol were new to the participants. All participants provided written  
280 informed consent and the study was approved by the ethics committees of the Karlsruhe Institute of  
281 Technology and the University of Tübingen.

282

### 283 **Apparatus and motor adaptation task**

284 Apparatus and task stem from a previous study (see 19, for a detailed description). Participants performed  
285 point-to-point reaching movements at a robotic manipulandum (Kinarm End-Point Lab, BKIN  
286 Technologies, Kingston, Canada; Fig. 1a). The manipulandum sampled position of the handle and forces  
287 exerted on the handle at 1000 Hz. Participants' grasped the handle and their forearm was supported by an

288 air-sled system which enabled low friction movements. The task goal was to move a cursor on a screen –  
289 controlled via the robot handle – into a target circle (Fig. 1b). To prevent movement anticipation, each  
290 trial started with a fixation cross and the highlight-duration of this fixation cross varied randomly between  
291 0.8 and 1.5 s. When the fixation cross changed its shape to a target circle, subjects were allowed to start  
292 their movement (no fast reaction times were required). After reaching the target, the manipulandum  
293 actively guided subjects' hands back to the center point and provided the beginning of the next trial. In  
294 total, six targets were arranged on a circle with a diameter of 20 cm surrounding the center target. The  
295 target order was pseudo-randomized so that in every block (containing 6 movements) every target  
296 highlighted just once. In addition, within each group the target order was different for every single subject  
297 so that the mean target direction and the mean force field magnitude across all subjects was identical of  
298 each specific trial.

299 The manipulandum can produce forces via the handle towards subjects' hands. In this study, we  
300 implemented three types of trials. In null field trials, no forces were produced and subjects performed  
301 movements under unperturbed conditions. In force field trials, the motors of the manipulandum were  
302 turned on and produced a velocity-dependent curl force field in clockwise direction with three different  
303 viscosity magnitudes of 10, 15, and 20 Ns/m. In force channel trials, the manipulandum produced a virtual  
304 force channel from start to target so that the subjects were only able to move along this path directly into  
305 the target (Fig. 1c). In every single trial, visual feedback about the movement time was given to ensure  
306 similar movement times across trials and subjects (< 450 ms: too slow; > 550 ms: too fast).

307 Offline calculations of dependent variables on the behavioral level were performed using  
308 MATLAB R2015b (MathWorks Inc., Natick, MA, United States). For null field and force field trials, we  
309 computed the motor error by using the enclosed area (EA) between subjects' hand path and the vector  
310 joining start and target (Fig. 1c, left). This parameter was averaged over 30 trials for the Baseline, First  
311 Training Trials, Last Training Trials, Posttest, and Transfer. To quantify motor performance in force  
312 channel trials, we calculated a force field compensation factor (FFCF; Fig. 1c, right) by means of the  
313 linear regression of the measured and the ideal perpendicular force profile (29) and averaged this across  
314 each 6 force channel trials. As subjects do not receive error-feedback in these trials, this parameter reflects  
315 mainly movement prediction and, thus, feedforward mechanisms (28). From now on, the term motor error  
316 will refer to the enclosed area and the term motor prediction will refer to the force field compensation  
317 factor.

318  
319 **Design and Procedures**  
320 This study compares the effects of random (unstable) vs. blocked (stable) training on motor adaptation and  
321 consolidation processes during wake vs. sleep. In a between-groups design, participants were randomly  
322 assigned to four equal sized groups ( $n = 12$ ) of comparable age (range 18–30 yrs;  $p > 0.45$ , for one-way  
323 ANOVA between groups) with altered training conditions and retention periods taken place either in the  
324 night or during the day. All participants trained with their dominant right hand the motor adaptation task.  
325 The task was either trained in a random trial sequence (Random group) or in three randomized blocks,  
326 each containing a consistent field magnitude (Blocked group). Participants trained either in the morning (9  
327 am; Fig. 1d) and were retested in the evening (8 pm; Wake-Random, WR; Wake-Blocked, WB) or, vice  
328 versa, trained in the evening and were retested the following morning after a night of sleep (Sleep-  
329 Random, SR; Sleep-Blocked, SB). The retention period between Training and Retest sessions was about  
330 11 hours for all groups. The Wake participants spent their awake time following their usual daily activity  
331 and Sleep participants went home after Training to sleep there with polysomnographic home recordings.  
332 Retest session contained a Posttest and Transfer test, quantifying the motor performance of participants  
333 using their right (Posttest) and left (Transfer) hand (Fig. 1d).

334 Before Training, participants were mounted with a task-EEG and familiarized themselves with the  
335 motor adaptation task. During Familiarization, participants performed 144 null field trials with their right  
336 hand. Before Training and Posttest, participants were tested on possible confounding effects of subjective  
337 sleepiness (Stanford Sleepiness Scale, SSS, 37), mood (Positive Affect Negative Affect Scale, PANAS,  
338 38,39), and objective vigilance (5-min Psychomotor Vigilance Task, PVT, 40).

339 Then, participants performed a Baseline measurement using 30 null field trials and 6 additional  
340 force channel trials. Training contained 144 force field trials followed by 6 consecutive force channel  
341 trials. All participants trained force field trials split into three force field magnitudes (10, 15 and 20 Ns/m)  
342 with a mean force field magnitude of 15 Ns/m over all trials. Random and Blocked groups trained the  
343 magnitudes under different training schedules that manipulate the training variability of those groups: the  
344 Random group trained all trials with force field magnitude switching from trial to trial in a pseudo-random  
345 order (unstable); the Blocked groups trained three trial blocks, each containing 48 trials with consistent  
346 force field magnitude, with force field magnitude switching only between the blocks. The block order was  
347 counterbalanced across participants of each group. The Wake group participants ended the Training  
348 session with unmounting of the task-EEG and were given instructions for the daytime until arrival for the  
349 Retest session in the evening; the Sleep group participants, however, were additionally prepared for the  
350 sleep-EEG and received instruction for the overnight home-polysomnography recording until the next day.  
351 The Sleep group started the Retest session with the unmounting of the sleep-EEG.

352 The Retest session was the same for all participants. Thereby, all participants performed a Posttest  
353 of the task with 6 force channel trials, 30 force field trials, and 6 force channel trials. All force field trials  
354 were fixed at the mean force field magnitude of the Training (15 Ns/m). Posttest was followed by a  
355 Transfer test. Transfer test had the same protocol as Posttest and participants performed the behavioral  
356 task with the non-dominant left hand. Note that the force field direction in the Transfer test was still  
357 clockwise.

358  
359 **Task-EEG**

360 To record the EEG during task performance we used the actiCHamp system with 32 active-electrodes and  
361 used the BrainVision PyCorder V1.0.6 for data recordings (Hard- and software from Brain Products,  
362 Gilching, Germany). The task-EEG was synchronized with the manipulandum via a direct link and the  
363 data was sampled at 1000 Hz. Electrodes were mounted on subjects' heads with a cap and 29 electrodes  
364 were used for the recording of cortical activity using the international 10-10 system (Fp1, Fp2, F7, F3, Fz,  
365 F4, F8, FC5, FC1, FC2, FC6, T7, C3, Cz, C4, T8, CP5, CP1, CP2, CP6, P7, P3, Pz, P4, P8, TP10, O1, Oz,  
366 O2). The remaining three electrodes were used to record horizontal and vertical eye movements. Electrode  
367 Cz was used as the reference and Fpz as the ground electrode. The impedances of the electrodes were kept  
368 below 10 k $\Omega$ .

369 Offline EEG analyses were done using MATLAB R2015b (MathWorks Inc., Natick, MA, United  
370 States) and EEGLAB 13.5.4b (41). Raw data of the task-EEG was filtered first by a FIR high-pass filter  
371 with a cut-off frequency of 0.5 Hz and then by a FIR low-pass filter with a cut-off frequency of 281.25  
372 Hz. Line noise was removed using the cleanline plugin for EEGLAB. Channels strongly affected by  
373 artifacts were removed by visual inspection and the missing channels restored using a spherical  
374 interpolation. Electrodes were re-referenced to the average reference and channel location Cz was  
375 reconstructed and appended to the data. Then, EEG data was epoched into segments of 8.5 s ranging from  
376 6 s before to 2.5 s after trial start. Principle component analysis (PCA) was performed to compress the  
377 data to 99.9 % of the variance and, thus, deal with the reduced rank due to interpolation. Then, infomax  
378 independent component analysis (ICA, 42) was performed on the principle components. To detect bad  
379 ICA components, the components were evaluated in the spectral, spatial and temporal domain.  
380 Components showing distinct artifacts were rejected and the data was re-transformed into the channel  
381 domain.

382 We calculated the percentage power in the frequency domain for subsequent statistical  
383 comparisons. For this, we used complex Morlet wavelets for the frequency decomposition. We  
384 decomposed the data into 40 frequency bins ranging from 2 to 100 Hz in logarithmic space with 5 to 19  
385 wavelet cycles changing as a function of frequency. The decomposed data was averaged over 30 trials and  
386 squared, resulting in the average power for: Baseline, First Training Trials, Last Training Trials, Posttest,  
387 and Transfer. Then, power was normalized according to the average reference period 250 ms before the  
388 highlighting of a fixation cross and the event-related desynchronization / synchronization (ERD / ERS)  
389 was calculated (43).



390 Data was averaged in the frequency domain into specific frequency bands: theta (4-7 Hz), alpha  
391 (8-13 Hz), beta (14-30 Hz), and gamma (30-45 Hz). The data was also compressed in the time-domain by  
392 averaging to two time windows: movement planning (-400 ms to 0 ms) and movement execution (0 s to  
393 400 ms), where 0 s indicates the start of the trial.

394

### 395 **Polysomnography and sleep-EEG analyses**

396 Standard polysomnography was assessed using a home recording system (Somnoscreen Plus,  
397 Somnomedics, Randersacker, Germany) including electroencephalography (EEG) at locations F3, F4, Fz,  
398 C3, C4, Cz, P3, P4, Pz (International 10–20 system), electrooculography (EOG) sites around the eyes,  
399 electromyography (EMG) with electrodes placed at each musculus mentalis as well as the two electrodes  
400 at each mastoids behind the ear. Fpz served as the ground electrode and Cz as the original reference. Data  
401 was digitized at 256 Hz and down-sampled to 128 Hz to facilitate computation. Offline manual sleep  
402 scoring and automatic basic sleep-EEG analysis was performed using the open-source toolbox SpiSOP  
403 (44). Data of two participants (one from the Blocked, one from Random group) were excluded for these  
404 analyses due to technical failures ( $n = 22$ ). Scoring was performed by an experienced rater according to  
405 standard criteria (45) and was blind to the participant's conditions. Sleep-EEG analyses, apart from sleep  
406 scoring, were performed on EEG channels re-referenced to the average signals from the mastoids. Sleep-  
407 EEG parameters were detected using standard settings of SpiSOP (44) based on analyses described in (46)  
408 and briefly described in the following.

409 **Power spectral analyses of sleep EEG.** Power spectra were calculated separately for Stage 2,  
410 SWS, non-REM and REM sleep on consecutive artifact-free 10 s intervals of non-REM sleep, which  
411 overlapped in time by 9 s. Each interval was tapered by a single Hanning-adapted window (1 s tails follow  
412 Hanning window, the other 8 s are 1) before applying Fast Fourier Transformation that resulted in interval  
413 power spectra with a frequency resolution of 0.1 Hz. Power spectra were then averaged across all blocks  
414 (Welch's method) and normalized by the effective noise bandwidth to obtain power spectral density  
415 estimates for the whole data. Mean power density in the following frequency bands was determined: slow-  
416 wave activity (0.5–4 Hz), theta (4–8 Hz), spindles (9–15 Hz), alpha (8–12 Hz), slow spindles (9–12 Hz)  
417 and fast spindles (12–15 Hz), and beta (15–30 Hz), and log transformed (decibel) prior to statistical  
418 testing.

419 **Slow waves.** For the identification of slow waves, the signal in each channel during non-REM  
420 sleep epochs was filtered between 0.5 and 3.5 Hz. Next, all intervals of time with consecutive positive-to-  
421 negative zero crossings were marked as putative slow waves if their durations corresponded to a frequency  
422 between 0.5 and 1.11 Hz (zero crossings marked beginning and end of slow oscillation), yet these were  
423 excluded in case their amplitude was  $>1000$  mV (as these were considered artifacts) or when both  
424 negative and positive half-wave amplitudes lay between  $-15$  and  $+10$  mV. A slow wave was identified if  
425 its negative half-wave peak potential was lower than the mean negative half-wave peak of all putatively  
426 detected slow oscillations in the respective EEG channel, and also only if the amplitude of the positive  
427 half-wave peak was larger than the mean positive half-wave amplitude of all other putatively detected  
428 slow waves within this channel. For each participant and channel, the number of slow oscillations, their  
429 density (per min non-REM sleep), mean amplitude, and slopes (down slope, the ratio between value of the  
430 negative half-wave peak and the time to the initial zero crossing, up slope, the ratio between absolute  
431 value of the negative half-wave peak and the time to the next zero crossing) were calculated.

432 **Sleep spindles.** For each EEG channel, the signal during non-REM epochs was filtered in a 2-Hz  
433 frequency band centered to the visually determined corresponding power peak (12 to 15 Hz range,  $13.32 \pm$   
434  $0.11$ ) in the non-REM power spectrum of each participant. Then, using a sliding window with a size of 0.2  
435 s, the root mean square was computed, and the resulting signal was smoothed in the same window with a  
436 moving average. A sleep spindle was detected when the smoothed RMS signal exceeded an individual  
437 amplitude threshold by 1.5 standard deviations of the filtered signal in this channel at least once and for  
438 0.5 to 3 s. The threshold crossings marked the beginning and end of each spindle and quantified their  
439 duration. Sleep spindle amplitude was defined by the voltage difference between the largest trough and the  
440 largest peak. Spindles were excluded for amplitudes  $>200$  mV. We focused the analysis on fast spindles  
441 only as slow spindles power peaks could not clearly identified in too many participants. For each

442 participant and channel's absolute spindle counts, spindle density (per min non-REM sleep), mean  
443 amplitude, average oscillatory frequency and duration were calculated.

444 **Sleep spindles co-occurring with slow wave upstates.** To explore if spindles co-occurring with  
445 slow waves possess altered properties and associations with behavior, we identified slow waves that had at  
446 least one detected sleep spindle from the lowest trough (down state) to +0.5 seconds after the next  
447 positive-to-negative zero crossing (i.e., the slow wave upstate). Only the first spindle with the shortest  
448 delay to the down state was considered. Then properties of these co-occurring sleep spindles and slow  
449 waves were determined as mentioned above. In addition, the mean delay of sleep spindles to the slow  
450 wave down state as well as the standard deviation of this delay were calculated to estimate the temporal  
451 dispersion of their co-occurrence.

452 For an exploratory analysis of standard and fine-tuned sleep EEG parameters and their  
453 associations with memory consolidation, power density, slow wave and sleep spindle parameters (e.g.  
454 density) were averaged per electrode. Pz, F3 and F4 was each excluded from analysis in two sleep subjects  
455 and C4 in one sleep subject since these electrodes went bad during sleep EEG recording with otherwise  
456 good sleep EEG.

457  
458 **Statistical analysis**

459 We used independent two-tailed *t*-tests and mixed model ANOVAs with the within factors time (First  
460 Training Trials, Last Training Trials), retention (Last Training Trials, Posttest; Last Training Trials,  
461 Transfer), and the between factors sleep (Sleep, Wake) and training (Random, Blocked) to test differences  
462 in the motor error (EA) and motor prediction (FFCF). Data normality was tested using the Shapiro-Wilk  
463 *W*-test, and parametric or nonparametric statistical tests were chosen accordingly. For choice of  
464 appropriate *t*-tests equal variances of groups was tested using Levene's test.

465 Statistical analysis of task-EEG in terms of a possible sleep effect were done using cluster-based  
466 statistics corrected by the maximum permuted cluster values (47). Therefore, mixed model ANOVAs with  
467 factors retention (Last Training Trials, Posttest; Last Training Trials, Transfer) and sleep (Sleep, Wake)  
468 were performed for every frequency band during movement planning and execution. Clusters were  
469 computed on the channel level according to *p*-values of the ANOVAs and the summed *F*-value for each  
470 cluster was stored as the observed statistic. Then, permutation testing was done using 1000 iterations. For  
471 each iteration, data was shuffled across both dimensions (retention, sleep), ANOVA was computed, and  
472 the maximum cluster value was stored. *P*-values were defined as the account of maximum permutation  
473 clusters exceeding the observed statistic divided by the number of iterations.

474 Furthermore, we tried to reproduce previous findings from our lab (19), targeting the neural basis  
475 for the benefits of variable training. Accordingly, independent *t*-tests between training groups (Random,  
476 Blocked) were performed to test alpha band power differences during Posttest and Transfer. In addition,  
477 motor error differences between Posttest and Last Training Trials (Training-to-Posttest) and Transfer and  
478 Last Training Trials (Training-to-Transfer) were computed for each subject on the behavioral level and  
479 correlated with the EEG data during Training using Spearman correlations.

480 Likewise, to find potential correlates of consolidation success within sleep parameters, we  
481 performed an explorative analysis across both Sleep groups using Spearman correlations between  
482 behavioral changes over the retention period and all sleep parameters (i.e., total sleep time [TST]; sleep  
483 onset delay; duration and percentage of TST sleep in stages like Wake after sleep onset, Stage 1, Stage 2,  
484 SWS, non-REM [i.e. SWS+Stage 2]; Power density of each sleep stage in the prominent frequency bands;  
485 parameters of slow waves, sleep spindles and their co-occurrence during the slow-wave upstates). Due to  
486 the explorative nature in the absence of a behavioral sleep effect we did not corrected these correlations  
487 for multiple comparisons.

488 Data and statistical analyses were performed using Matlab R2015b (Mathworks, Natick, USA) for  
489 Windows, JASP 0.8.0.1 ([www.jasp-stats.org](http://www.jasp-stats.org)), and [R] (Windows 64bit version, 3.3.1, R Development  
490 Core Team) [The R Foundation for Statistical Computing, ([www.r-project.org/foundation](http://www.r-project.org/foundation)) 2007].  
491 Threshold for statistical significance was set to  $p = 0.05$ . Multiple comparisons were either corrected by  
492 the maximum statistic (permutation test) or by the False Discovery Rate (FDR, 48). In the case of FDR, *p*-  
493 values in this study represent the FDR corrected *p*-value (49).

494

#### 495 **Data availability**

496 All data needed to evaluate the conclusions in the paper are present in the paper and/or the Supplementary  
497 Materials, including a Supplemental Data file (csv format) of all individual data points. Additional data  
498 related to this paper may be requested from the authors. Computer codes used to generate the results can  
499 be provided upon request. Code for sleep analyses and standard parameters is publicly available at  
500 [www.spisop.org](http://www.spisop.org).

501

502

503

#### 504 **References**

- 505 1. King, B. R., Hoedlmoser, K., Hirschauer, F., Dolfen, N. & Albouy, G. Sleeping on the motor engram:  
506 The multifaceted nature of sleep-related motor memory consolidation. *Neurosci. Biobehav. Rev.* **80**,  
507 1–22 (2017).
- 508 2. Plihal, W. & Born, J. Effects of early and late nocturnal sleep on declarative and procedural memory.  
509 *J. Cogn. Neurosci.* **9**, 534–47 (1997).
- 510 3. Fischer, S., Hallschmid, M., Elsner, A. L. & Born, J. Sleep forms memory for finger skills. *Proc. Natl.*  
511 *Acad. Sci. USA* **99**, 11987–11991 (2002).
- 512 4. Albouy, G. *et al.* Sleep stabilizes visuomotor adaptation memory: A functional magnetic resonance  
513 imaging study. *J. Sleep Res.* **22**, 144–154 (2013).
- 514 5. Donchin, O., Sawaki, L., Madupu, G., Cohen, L. G. & Shadmehr, R. Mechanisms influencing  
515 acquisition and recall of motor memories. *J. Neurophysiol.* **88**, 2114–2123 (2002).
- 516 6. Rickard, T. C., Cai, D. J., Rieth, C. A., Jones, J. & Ard, M. C. Sleep does not enhance motor sequence  
517 learning. *J. Exp. Psychol. Learn. Mem. Cogn.* **34**, 834–842 (2008).
- 518 7. Adi-Japha, E. & Karni, A. Time for considering constraints on procedural memory consolidation  
519 processes: Comment on Pan and Rickard (2015) with specific reference to developmental changes.  
520 *Psychol. Bull.* **142**, 568–571 (2016).
- 521 8. Rickard, T. C. & Pan, S. C. Time for considering the possibility that sleep plays no unique role in  
522 motor memory consolidation: Reply to Adi-Japha and Karni (2016). *Psychol. Bull.* **143**, 454–458  
523 (2017).
- 524 9. Shadmehr, R. & Mussa-Ivaldi, F. A. Adaptive representation of dynamics during learning of a motor  
525 task. *J. Neurosci.*, **14**, 3208–3224 (1994).
- 526 10. Shea, J. B. & Morgan, R. L. Contextual interference effects on the acquisition, retention, and transfer  
527 of a motor skill. *J. Exp. Psychol. Hum. Learn. Mem.* **5**, 179–187 (1979).
- 528 11. Magill, R. A. & Hall, K. G. A review of the contextual interference effect in motor skill acquisition.  
529 *Hum. Mov. Sci.* **9**, 241–289 (1990).
- 530 12. Lage, G. M. *et al.* Repetition and variation in motor practice: A review of neural correlates. *Neurosci.*  
531 *Biobehav. Rev.* **57**, 132–141 (2015).
- 532 13. Debarnot, U., Abichou, K., Kalenzaga, S., Sperduti, M. & Piolino, P. Variable motor imagery training  
533 induces sleep memory consolidation and transfer improvements. *Neurobiol. Learn. Mem.* **119**, 85–92  
534 (2015).
- 535 14. Dick, M. B., Hsieh, S., Bricker, J. & Dick-Muehlke, C. Facilitating acquisition and transfer of a  
536 continuous motor task in healthy older adults and patients with Alzheimer’s disease. *Neuropsychology*  
537 **17**, 202–212 (2003).
- 538 15. Martel, G. *et al.* Dynamic interplays between memory systems depend on practice: The hippocampus  
539 is not always the first to provide solution. *Neuroscience* **150**, 743–753 (2007).
- 540 16. Merbah, S. & Meulemans, T. Learning a motor skill: Effects of blocked versus random practice a  
541 review. *Psychol. Belg.* **51**, 15–48 (2011).
- 542 17. Witt, K., Margraf, N., Bieber, C., Born, J. & Deuschl, G. Sleep consolidates the effector-independent  
543 representation of a motor skill. *Neuroscience* **171**, 227–234 (2010).
- 544 18. Jeannerod, M. *The neural and behavioural organization of goal-directed movements* (Oxford

- 545 University Press, 1988).
- 546 19. Thürer, B., Stockinger, C., Putze, F., Schultz, T. & Stein, T. Mechanisms within the parietal cortex  
547 correlate with the benefits of random practice in motor adaptation. *Front. Hum. Neurosci.* **11**, 1–11  
548 (2017).
- 549 20. Brashers-Krug, T., Shadmehr, R. & Bizzi, E. Consolidation in human motor memory. *Nature* **382**, 252  
550 (1996).
- 551 21. Shadmehr, R. & Brashers-Krug, T. Functional stages in the formation of human long-term motor  
552 memory. *J. Neurosci.* **17**, 409–19 (1997).
- 553 22. Rasch, B. & Born, J. About sleep's role in memory. *Physiol. Rev.* **93**, 681–766 (2013).
- 554 23. Maingret, N., Girardeau, G., Todorova, R., Goutier, M., & Zugaro, M. Hippocampo-cortical  
555 coupling mediates memory consolidation during sleep. *Nat. Neurosci.* **19**, 959 (2016).
- 556 24. Khodagholy, D., Gelinas, J. N. & Buzsáki, G. Learning-enhanced coupling between ripple oscillations  
557 in association cortices and hippocampus. *Science* **358**, 369–372 (2017).
- 558 25. Pereira, S. I. R. *et al.* Tactile stimulation during sleep alters slow oscillation and spindle densities but  
559 not motor skill. *Physiology & behavior* **169**, 59–68 (2017).
- 560 26. Huber, R., Ghilardi, M. F., Massimini, M. & Tononi, G. Local sleep and learning. *Nature* **430**, 78  
561 (2004).
- 562 27. Schmidt, R. & Lee, T. *Motor control and learning: A behavioral emphasis* (Human Kinetics, 2011).
- 563 28. Scheidt, R. A., Reinkensmeyer, D. J., Conditt, M. A., Rymer, W. Z. & Mussa-Ivaldi, F. A. Persistence  
564 of motor adaptation during constrained, multi-joint, arm movements. *J. Neurophysiol.* **84**, 853–862  
565 (2000).
- 566 29. Joiner, W. M. & Smith, M. A. Long-term retention explained by a model of short-term learning in the  
567 adaptive control of reaching. *J. Neurophysiol.* **100**, 2948–2955 (2008).
- 568 30. Malfait, N., and Ostry, D. J. Is interlimb transfer of force-field adaptation a cognitive response to the  
569 sudden introduction of load? *J. Neurosci.* **24**, 8084–9 (2004).
- 570 31. Stockinger, C., Thürer, B. & Stein, T. Consecutive learning of opposing unimanual motor tasks using  
571 the right arm followed by the left arm causes intermanual interference. *PLoS ONE* **12**, 1–20 (2017).
- 572 32. Berniker, M., Franklin, D. W., Flanagan, J. R., Wolpert, D. M. & Kording, K. Motor learning of novel  
573 dynamics is not represented in a single global coordinate system: evaluation of mixed coordinate  
574 representations and local learning. *J. Neurophysiol.* **111**, 1165–1182 (2014).
- 575 33. Franklin, D. W., Batchelor, A. V. & Wolpert, D. M. The sensorimotor system can sculpt behaviorally  
576 relevant representations for motor learning. *eNeuro*, 3; [10.1523/ENEURO.0070-16.2016](https://doi.org/10.1523/ENEURO.0070-16.2016) (2016).
- 577 34. Whitlock, J. R. Posterior parietal cortex. *Curr. Biol.* **27**, 691–695 (2017).
- 578 35. Klimesch, W. Alpha-band oscillations, attention, and controlled access to stored information. *Trends*  
579 *Cogn. Sci.* **16**, 606–617 (2012).
- 580 36. Oldfield, R. C. The assessment and analysis of handedness: The edinburgh inventory.  
581 *Neuropsychologia* **9**, 97–113 (1971).
- 582 37. Hoddes, E., Zarcone, V., Smythe, H., Phillips, R. & Dement, W. C. Quantification of sleepiness: a  
583 new approach. *Psychophysiology* **10**, 431–436 (1973).
- 584 38. Krohne, H. W., Egloff, B., Kohlmann, C.-W. & Tausch, A. Untersuchungen mit einer deutschen  
585 version der "positive and negative affect schedule"(PANAS). *Diagnostica* **42**, 139–156 (1996).
- 586 39. Watson, D., Clark, L. A. & Tellegen, A. Development and validation of brief measures of positive and  
587 negative affect: the PANAS scales. *J. Pers. Soc. Psychol.* **54**, 1063–1070 (1988).
- 588 40. Roach, G. D., Dawson, D. & Lamond, N. Can a shorter psychomotor vigilance task be used as a  
589 reasonable substitute for the ten-minute psychomotor vigilance task? *Chronobiol. Int.* **23**, 1379–1387.
- 590 41. Delorme, A. & Makeig, S. EEGLAB: An open source toolbox for analysis of single-trial EEG  
591 dynamics including independent component analysis. *J. Neurosci. Methods* **134**, 9–21 (2004).
- 592 42. Makeig, S., J. Bell., A., Jung, T.-P. & Sejnowski, T. J. Independent component analysis of  
593 electroencephalographic data. *Adv. Neural Inf. Process. Syst.* **8**, 145–151 (1996).
- 594 43. Pfurtscheller, G. & Lopes, F. H. Event-related EEG / MEG synchronization and desynchronization:  
595 basic principles. *Clin. Neurophysiol.* **110**, 1842–1857 (1999).
- 596 44. Weber, F. D. *SpiSOP software repository, SpiSOP – Spindles, slow oscillations, power density and*

- 597 *fast replication of basic sleep EEG analyses in one tool*. <http://www.spisop.org> (2015).  
598 45. Rechtschaffen, A. & Kales A. *A manual of standardized terminology, techniques and scoring system*  
599 *for sleep stages of human subjects* (Washington Public Health Service, US Government Printing  
600 Office, 1968).  
601 Wang, J. Y., Weber, F. D., Zinke, K., Inostroza, M., & Born, J. More effective consolidation of  
602 episodic long-term memory in children than adults—Unrelated to sleep. *Child Dev.* (2017).  
603 46. Cohen, M. X. *Analyzing neural time series data: Theory and practice* (MIT press, 2014).  
604 47. Benjamini, Y. & Hochberg, Y. Controlling the false discovery rate: a practical and powerful approach  
605 to multiple testing. *J. R. Statist. Soc. B.* **57**, 289–300 (1995).  
606 48. Benjamini, Y. & Yekutieli, D. The control of the false discovery rate in multiple testing under  
607 dependency. *Ann. Stat.* **29**, 1165–1188 (2001).

608  
609 **Acknowledgements**  
610 We like to thank Marco Kappler for his assistance in the data recordings. This work was supported by the  
611 Graduate Funding from the German States, Deutsche Forschungsgemeinschaft (SFB 654, “Plasticity and  
612 Sleep”) and Open Access Publishing Fund of Karlsruhe Institute of Technology.  
613

614 **Author contributions**  
615 B.T. and F.D.W. conceived and designed the experiment, conducted them, analyzed the results and co-  
616 wrote the paper under contribution and supervision of J.B. and T.S. All authors reviewed the final  
617 manuscript.

618 **Additional Information**  
619 **Supplementary information** accompanies this paper  
620 **Competing financial interests:** the authors declare no competing financial interests.  
621  
622

623 **Figure Legends**  
624 **Figure 1:** Motor adaptation task and experimental design. (a) The motor adaptation task was instrumented  
625 by a robotic manipulandum (Kinarm End-Point Lab, BKIN Technologies) with a custom made low  
626 friction air-sled system. The robotic manipulandum can induce force fields to perturb participants’ hand  
627 movements. During the task, participants’ EEG is recorded. (b) Example of one trial from highlighting of  
628 the fixation cross to trial termination by reaching the target. (c) Sketch of the parameters quantifying the  
629 motor error (enclosed area, EA) and motor prediction (force field compensation factor, FFCF). Enclosed  
630 area (left) is defined by the area between the trajectory and the direct line between start and target. Arrows  
631 indicate the force field direction. The FFCF (right) is computed using the subject’s forces ( $F_x$ ) directed  
632 against virtual channel walls and compared to the ideal force profile to cancel out the perturbation. (d) All  
633 participant groups had a Training session to train the motor adaptation task with their dominant right hand  
634 including Familiarization phase, Control tests (subjective sleepiness, mood, and vigilance), a Baseline, and  
635 the force field Training (gray blocks). After a Retention period, Retest performance was quantified in a  
636 Posttest and an additional Transfer test on the left hand. Groups differed in their training and consolidation  
637 period. The Random groups trained motor adaptation under highly unstable conditions and the Blocked  
638 groups under more stable training conditions. The Wake groups trained in the morning and were retested  
639 in the evening and the Sleep groups were trained in the evening and retested the following morning after a  
640 night of sleep.

641

642 **Figure 2:** Behavioral results. (a) Progress of the mean ( $\pm$  s.e.m) motor error (enclosed area, EA) for the  
643 Blocked (black) and Random (red) groups during Training (left), Posttest (middle) and Transfer trials  
644 (right). (b) Mean ( $\pm$  s.e.m) motor error across 30 trials for each group during First and Last Training  
645 Trials, Posttest and Transfer. SB: Sleep-Blocked, SR: Sleep-Random, WB: Wake-Blocked, WR: Wake-  
646 Random. (c) P-values of different factors and interactions of the mixed ANOVAs investigating a  
647 consolidation effect from Training to Posttest and (d) Training to Transfer.

648  
649 **Figure 3:** Mean alpha band power. Progress of the mean alpha band power for Blocked and Random  
650 groups during the Training session and during the Posttest and Transfer test of the Retest session.  
651 Leftmost and rightmost topographies represent the mean power across motor planning (-400–0 ms) and  
652 execution (0–400 ms) with respect to the trial start (0 ms). Other plots represent the topographical power  
653 at specific points in time (from -300–300 ms). Power values are in percentage of the average reference  
654 period 250 ms before the highlighting of a fixation cross.

655  
656 **Figure 4:** Association between Training-to-Posttest difference for motor error and alpha power.  
657 Associations between Training-to-Posttest difference of the motor error (quantified by the enclosed area)  
658 and alpha power (8–13 Hz) for ROI (CP5, CP1, Pz, P3) during motor execution were tested using  
659 Spearman correlation. Each red cross represents the data of a single participant from the Random group  
660 and each black circle of a participant from the Blocked group. Lines represent a basic linear fit (red:  
661 Random; black: Blocked) and  $\rho$  represent Spearman's rho.

662  
663 **Figure 5:** Prediction of motor memory consolidation by alpha power (8–13 Hz) during Training. The  
664 predictability of motor memory consolidation (Training-to-Posttest or Training-to-Transfer difference of  
665 motor error) is indicated. Each plot represents the data points for each participant of the Blocked (black  
666 circle) and Random (red cross) groups together with their groups' linear fit. Asterisks indicate a  
667 significant Spearman correlation coefficient after FDR correction. Lines represent basic linear fit whereas  
668  $\rho$  represents Spearman's rho.

a

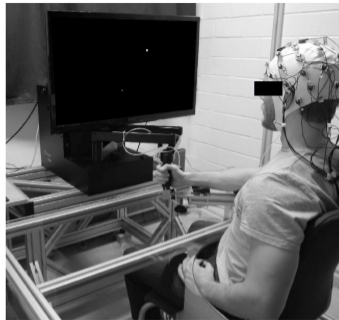

b

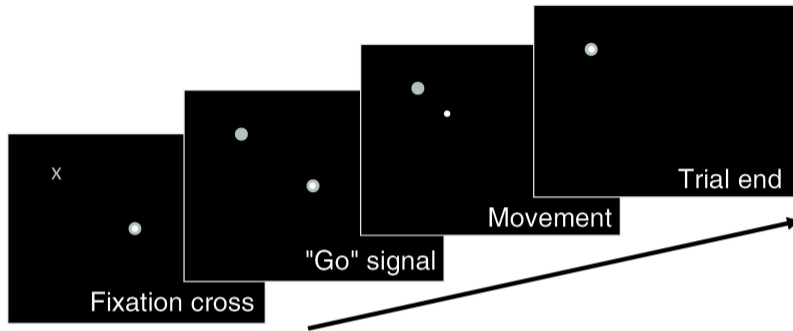

c

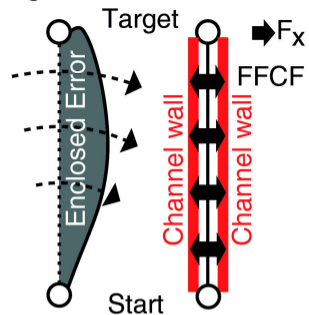

d

Training session

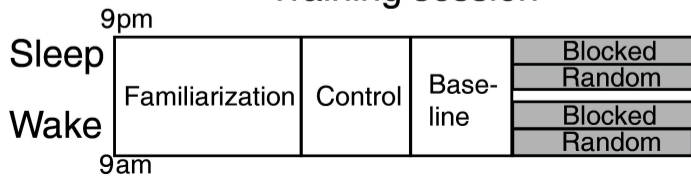

Retention period

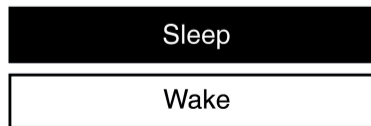

Retest session

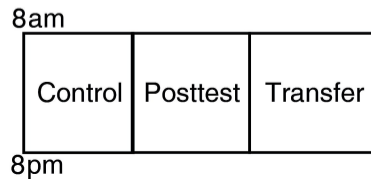

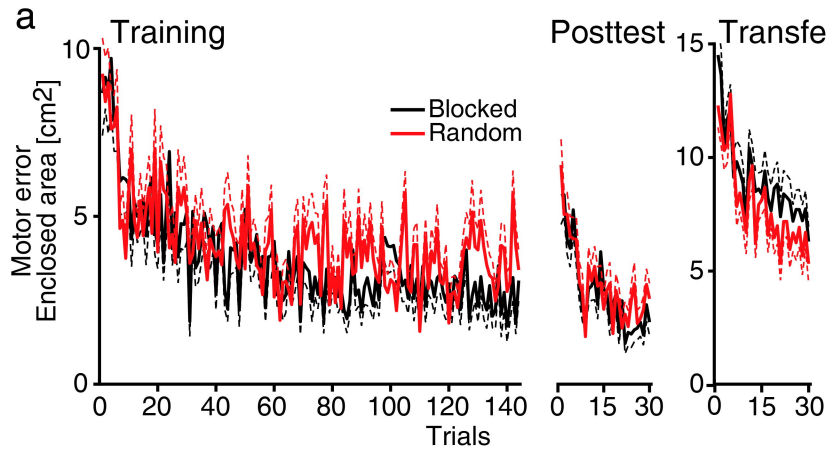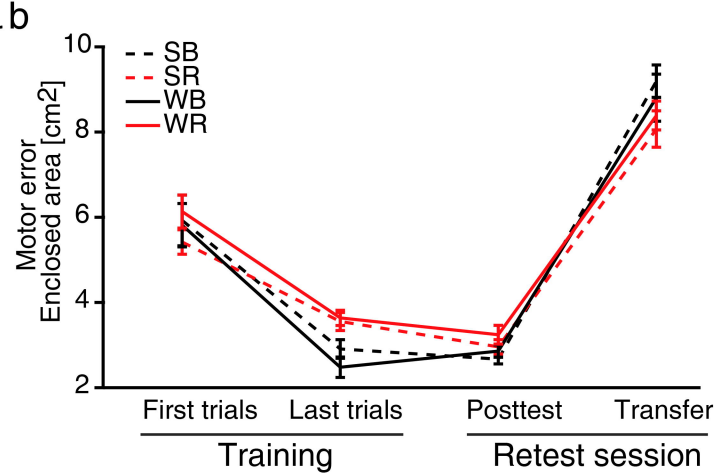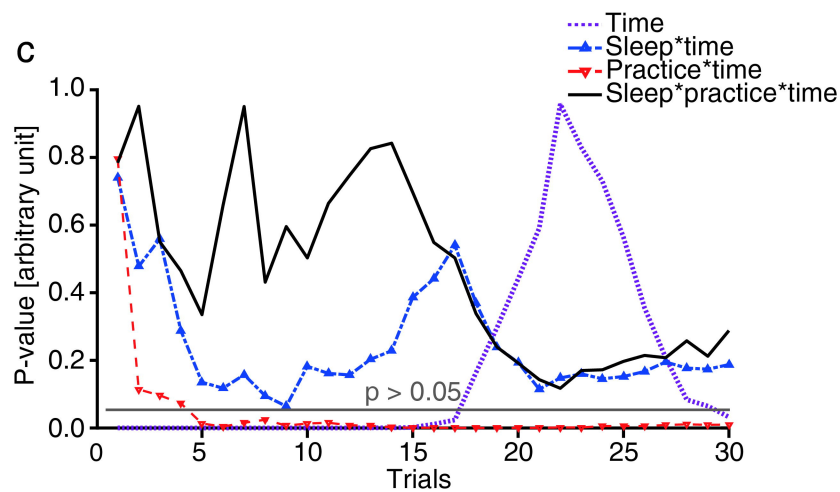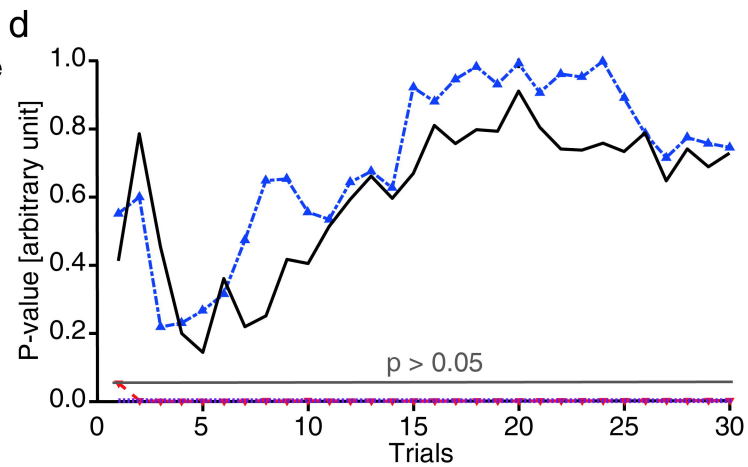



-50  50  
Power [%]

Planning

Execution

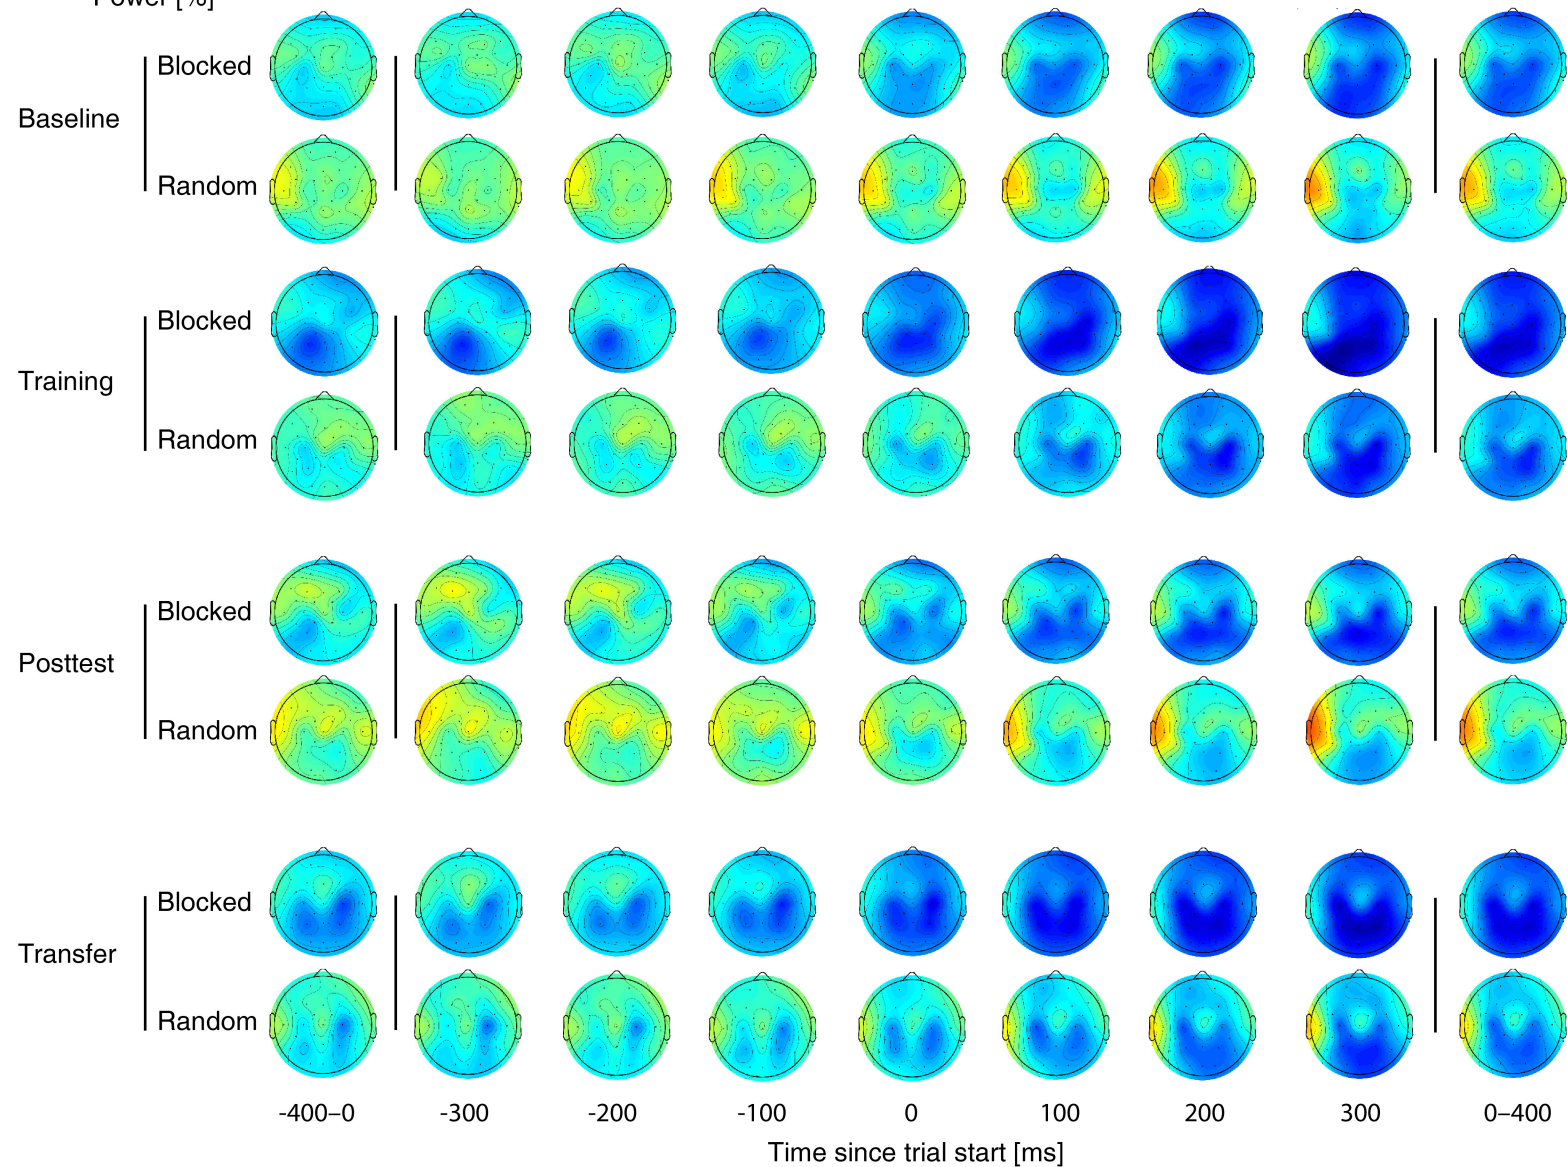

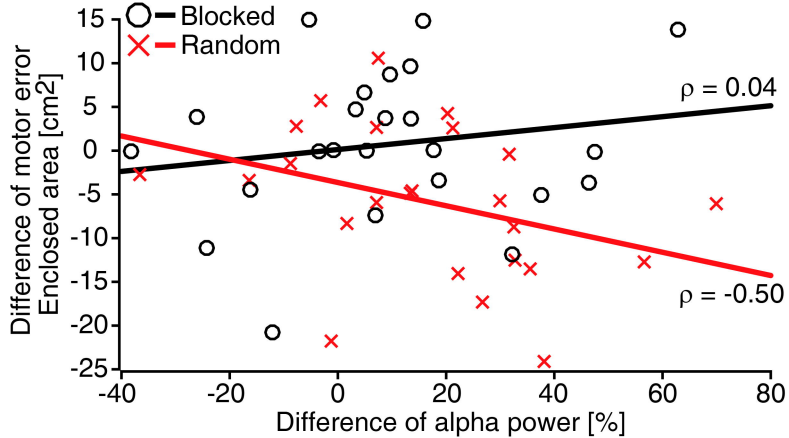

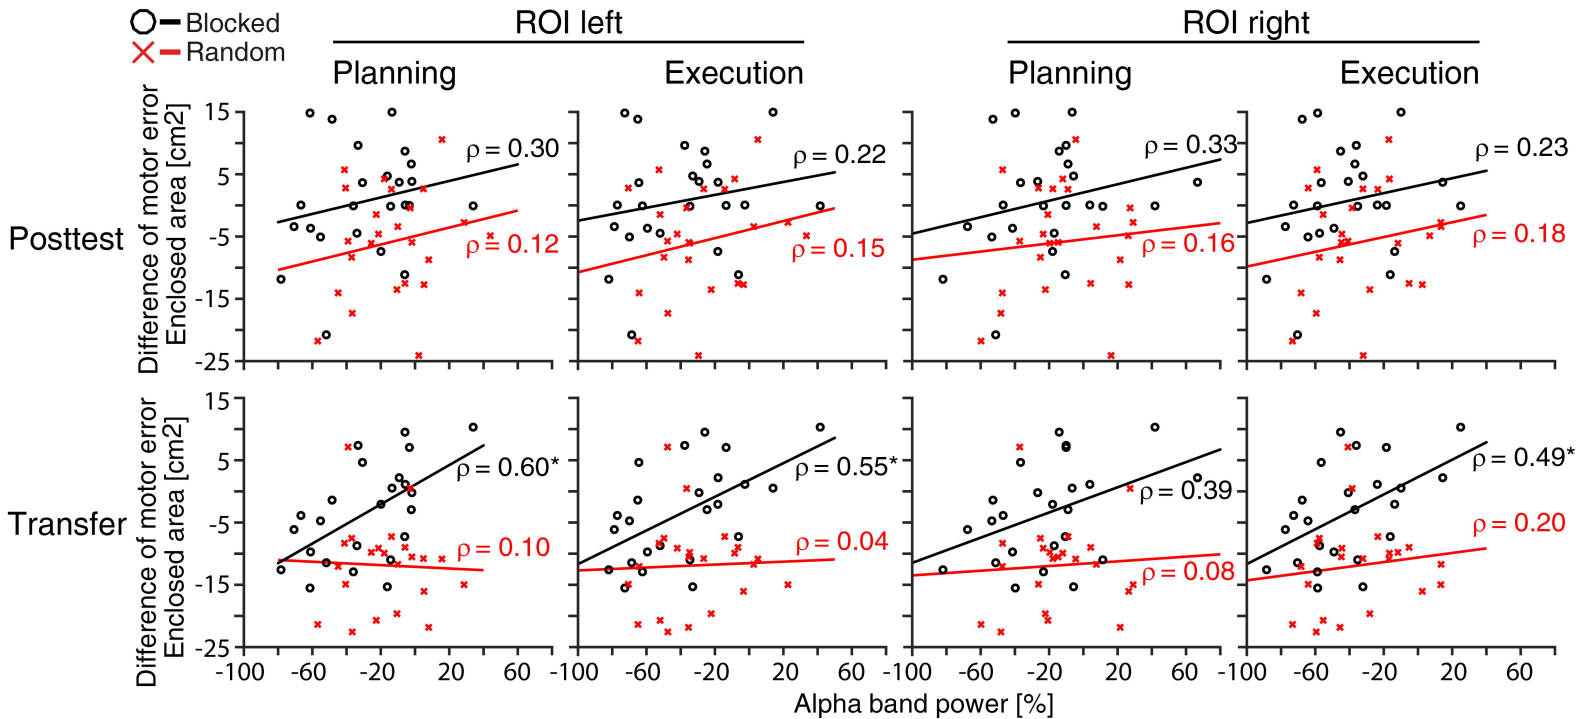

Source: https://www.biorxiv.org/content/10.1101/259671v2.full.pdf
